# Supplementary material for: Ascorbic acid alleviates rheumatoid arthritis by inhibiting the production of autoantibodies
Source: PubMed Central journal article supplement (PMC11267742; doi:10.1186/s12964-024-01756-x), 2024-07-24

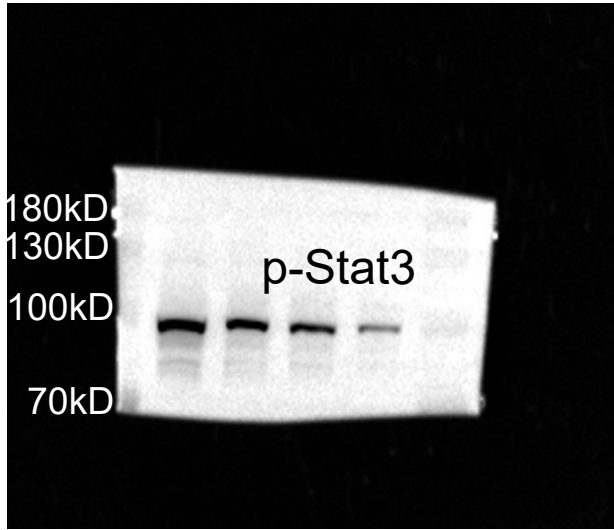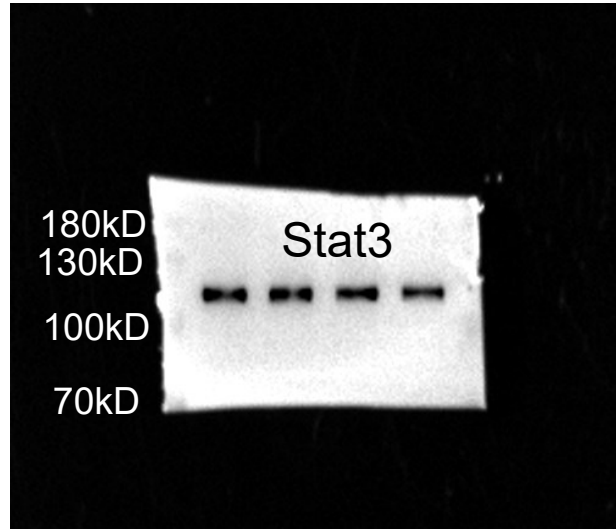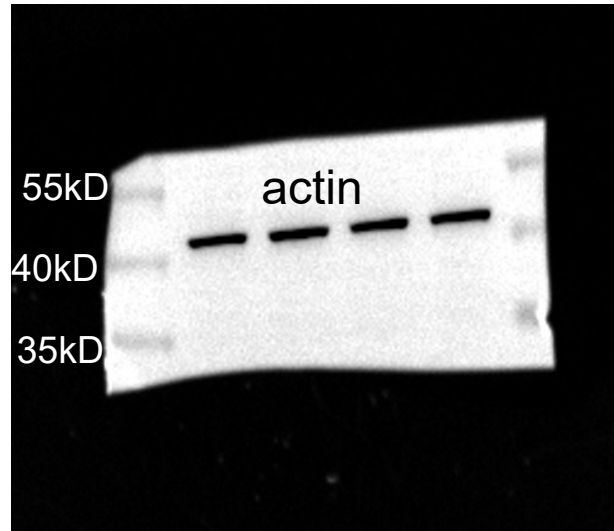

Supplement: 12964_2024_1756_MOESM2_ESM.pdf [file 12964_2024_1756_MOESM2_ESM.pdf]
